# Supplementary material for: Transcriptomic Analysis of Staphylococcus xylosus in Solid Dairy Matrix Reveals an Aerobic Lifestyle Adapted to Rind
Source: MDPI journal article supplement (doi:10.3390/microorganisms8111807), 2020-11-17
Supplement: s1 [file s1]

**Supplementary Table S1.** Targeted genes of *Staphylococcus xylosus* for the validation of microarray data by qPCR: expression at T24h and T48h in solid dairy matrix compared with T6h.

| Gene Id    | Gene name    | Sequences of primers pairs for qPCR (5'-3') |                               | Mean ratio of expression |       |       |       |
|------------|--------------|---------------------------------------------|-------------------------------|--------------------------|-------|-------|-------|
|            |              |                                             |                               | Microarray               |       | qPCR  |       |
|            |              | Forward                                     | Reverse                       | 24h                      | 48h   | 24h   | 48h   |
| SXYL_00370 |              | ATGCCAAAAGTATCCTTAGTACCA                    | GCACGTTTCATCTCAATCGTC         | 0.2                      | 0.2   | 0.1   | 0.1   |
| SXYL_02535 | <i>ahpF</i>  | AACGCACACCAAGTTTCTCA                        | TTAATGCTTGAACAACGTGAGG        | 0.3                      | 0.3   | 0.1   | 0.0   |
| SXYL_00197 |              | ATAGTCGTGGCTTTCTTCCTAC                      | ATTGAACTTGAGATACATTATCAGGC    | 15.7                     | 13.6  | 8.2   | 7.0   |
| SXYL_01277 | <i>dnaK</i>  | TTAGGTACAACAAATTCATGTATTGCA                 | GATAGATTGGATTGTATTAGGGTTAGTGA | 0.4                      | 0.4   | 0.1   | 0.1   |
| SXYL_02088 | <i>uvrA</i>  | AGCGTAGATATGTTGAATCATTAAAGTG                | GGTTGCACAGTAGATCTTGGA         | 2.3                      | 2.1   | 2.4   | 2.2   |
| SXYL_02230 |              | GAAACAACCTTTCCATAATTCGCTTTT                 | ATCATATACTTCAACAACCTTGAGCT    | 0.5                      | 0.4   | 0.2   | 0.1   |
| SXYL_02534 | <i>ahpC</i>  | CACAGCTAACGCTTATGATCC                       | CGAATGAGAAGTCTGCTGGG          | 0.3                      | 0.3   | 0.1   | 0.1   |
| SXYL_00173 |              | GGAAGTTGGATAGAGCCACAA                       | TTCTACACGATCCGCAATATCTAAT     | 12.2                     | 6.8   | 11.4  | 5.7   |
| SXYL_00607 | <i>araB1</i> | ATGGGCACAGTCAATAGT                          | TTACGAGGTAATCGCCTGC           | 2.6                      | 2.0   | 2.2   | 2.1   |
| SXYL_01961 | <i>argG</i>  | TGGTTTAGATACAAGTGTGCGCA                     | TGCATATGACACGAAATCTTCAC       | 3.0                      | 6.9   | 2.7   | 6.3   |
| SXYL_00226 | <i>betA</i>  | TTCACTACTAGGTGGCCGAT                        | AAACTTTACCACGTGCATGTC         | 1.6                      | 1.6   | 0.9   | 1.2   |
| SXYL_00108 |              | ATGGTGAGCAAATTCAAACTGAAA                    | AAGCATTAGCAGCGCTATCAA         | 21.6                     | 14.1  | 17.1  | 7.6   |
| SXYL_02630 | <i>cysC</i>  | GCATGCGTCAGAAAGTAACTAAAG                    | CGATCTTCTGGACTAAATCCAAGAT     | 25.1                     | 29.9  | 17.5  | 37.4  |
| SXYL_02638 | <i>cysH</i>  | GTACGAAACATATGGCGATTCTATTAT                 | TAACAACATIGATTGCGATCGTTC      | 20.0                     | 18.5  | 19.3  | 23.1  |
| SXYL_02636 | <i>cysI</i>  | ACAGACAGTGATTATCTTCGTGG                     | TATGTGTTTGGCATATCGTCCAT       | 49.2                     | 43.5  | 46.9  | 54.0  |
| SXYL_00784 | <i>czrA</i>  | GGAAGATTCATTTAACGAACAAACG                   | TTGGTGAGAAACGTTAGATTGACT      | 5.5                      | 6.1   | 4.1   | 4.5   |
| SXYL_02149 | <i>fruK</i>  | AGGAGGCTTTCCAGGACAA                         | GTGGACCAGCGCATTAAAT           | 0.1                      | 0.4   | 0.1   | 0.2   |
| SXYL_00101 |              | GCAGAAGAAGGTGCAAAACG                        | GCGTTATTGACCAAGCCATC          | 2.3                      | 2.1   | 2.2   | 2.0   |
| SXYL_00107 | <i>glnA2</i> | GGTAAGCGAATTACTGGAGACTT                     | CCGTCTACGGAGTAAACATCA         | 25.5                     | 14.6  | 37.2  | 14.9  |
| SXYL_02582 |              | ACGCCTGTAGCTCAAATAGTG                       | GGCTGCGAATTCTCTGGAAT          | 2.9                      | 4.2   | 2.1   | 3.8   |
| SXYL_00467 | <i>hisG</i>  | GCGTTAGAACAGAGAGAACGT                       | GCCAAATGGTAAGTCCAGAAG         | 3.4                      | 2.6   | 4.3   | 2.9   |
| SXYL_00618 | <i>hutI</i>  | GATGGCAAAGTAGTTTATGCAGG                     | TCCACCTTGTTCAGAAATTCTA        | 3.8                      | 3.7   | 3.1   | 2.9   |
| SXYL_00276 | <i>ldhB</i>  | GGAAGAGTAGGTAGTCAAGTTTAAAC                  | CTAATAATGTACGATCGCCATCATT     | 2.6                      | 4.8   | 3.2   | 5.0   |
| SXYL_00868 | <i>leuD</i>  | CAGGTAAAGTAGTGCCATTATTCC                    | ACCAGTAATTAAAATTGAAGCACCTT    | 5.0                      | 3.0   | 4.7   | 2.4   |
| SXYL_01974 | <i>mnhE1</i> | CGTCACAGGCAGTTATACATTTAATAA                 | CGGCTCATTATCAATCTTTGGTTT      | 0.3                      | 0.3   | 0.1   | 0.1   |
| SXYL_02147 | <i>nagA</i>  | GGACGCTTCATTGGAAGGATT                       | TCCCAACAATACTAGCTGCAT         | 0.5                      | 0.5   | 0.3   | 0.2   |
| SXYL_01002 |              | CATAGAGCGAGAGTGACGG                         | ACCACTACCTCGTTCACCTT          | 0.3                      | 0.3   | 0.1   | 0.1   |
| SXYL_01803 | <i>pheT</i>  | TAACGTGCTTGCTGAACGTAT                       | TGGCTCTACTTCACCAATGTC         | 0.4                      | 0.5   | 0.3   | 0.6   |
| SXYL_01869 | <i>purC</i>  | GTGGTAAGAAATATTGCTGCAGG                     | GAAGTCTACTAACCTTAAGTTCATTCA   | 15.5                     | 8.0   | 8.6   | 3.4   |
| SXYL_01870 | <i>purK</i>  | CAACAATCGGCATTATTGGTGG                      | ACCAAGTTGTTCATATGCTTC         | 19.1                     | 10.8  | 10.0  | 5.7   |
| SXYL_02631 | <i>sat</i>   | AACTCGATGAAATGGAACGC                        | GGCGCACGTAATCTAATCATAA        | 47.8                     | 47.2  | 76.9  | 83.4  |
| SXYL_00837 |              | AACAGTAATCGCATCAACTTTAGC                    | CCTTCTGAACTGGTGCTTCA          | 125.1                    | 125.6 | 121.3 | 108.8 |
| SXYL_00841 | <i>thiE</i>  | GTGGTACTCAAGATATACCAGTATCG                  | GGTACATTATAAGCGTGACAAAGC      | 1.9                      | 1.8   | 1.2   | 1.7   |
| SXYL_01498 | <i>trpB</i>  | GATTATGTCGCGCGTGAAC                         | CGTTTAGCCAACAGTGCTTG          | 7.9                      | 8.2   | 10.0  | 19.3  |
| SXYL_01500 | <i>trpC</i>  | TGCTCGAACAGGGCTATTATG                       | GTGCTAAATCTCTACCTGGCA         | 7.0                      | 7.1   | 8.0   | 12.2  |
| SXYL_00296 | <i>ureA</i>  | GCAGCAGATTTAGCTCGTAGA                       | CCTCCATTACATCATCTCACC         | 2.8                      | 2.0   | 2.7   | 2.1   |
| SXYL_00417 |              | GTAATCAACAGACACTATGGACG                     | GGGTATTAAATAACTTAACGTGATCTGAG | 25.0                     | 18.6  | 19.1  | 20.7  |
| SXYL_02348 |              | TCAACACTTGTAGTAGGTTCTTCAG                   | TTCAGCTTTTAGTCTGCTTTACTTT     | 109.8                    | 124.6 | 121.7 | 191.1 |
| SXYL_02642 |              | GAAGTAATATTCGATGCACATAGAGG                  | ACCTTCAGTTTAGCTAGCTTT         | 28.7                     | 28.4  | 15.5  | 23.2  |
| SXYL_02634 |              | GTCTTATATGTAAGTCACGGTAGTAGAG                | GTTCAATTTCTGATGGAATGTCCTT     | 46.8                     | 45.4  | 49.1  | 79.9  |
| SXYL_02644 | <i>metE</i>  | TTACACAAAGAGAACTTATTACTCCAAA                | ATATAGTGATAGTTTGTGTGAACCATT   | 124.1                    | 115.3 | 90.9  | 105.2 |
| SXYL_02645 |              | ATTAGAACAATTTAAATCATCAACGTGG                | AGTACCATACTGACTTACAATATTCCAA  | 112.5                    | 99.0  | 107.4 | 107.6 |
| SXYL_00255 |              | GACGTATGAAAATGGATAAGAATTTGATG               | TCATCAGCAAAATAAGGAAATGCTTT    | 15.0                     | 9.0   | 12.6  | 8.3   |
| SXYL_00744 | <i>amaP</i>  | GGCATATTAATTGTAGTAATCGTTGGA                 | GACCAATAATAATGAGTAACGCTGC     | 13.2                     | 11.3  | 9.3   | 10.1  |
